# Supplementary figures and images for: From widespread Mississippian to localized Pennsylvanian extension in central Spitsbergen, Svalbard
Source: Copernicus journal article supplement (doi:10.5194/se-2018-86), 2018-08-27

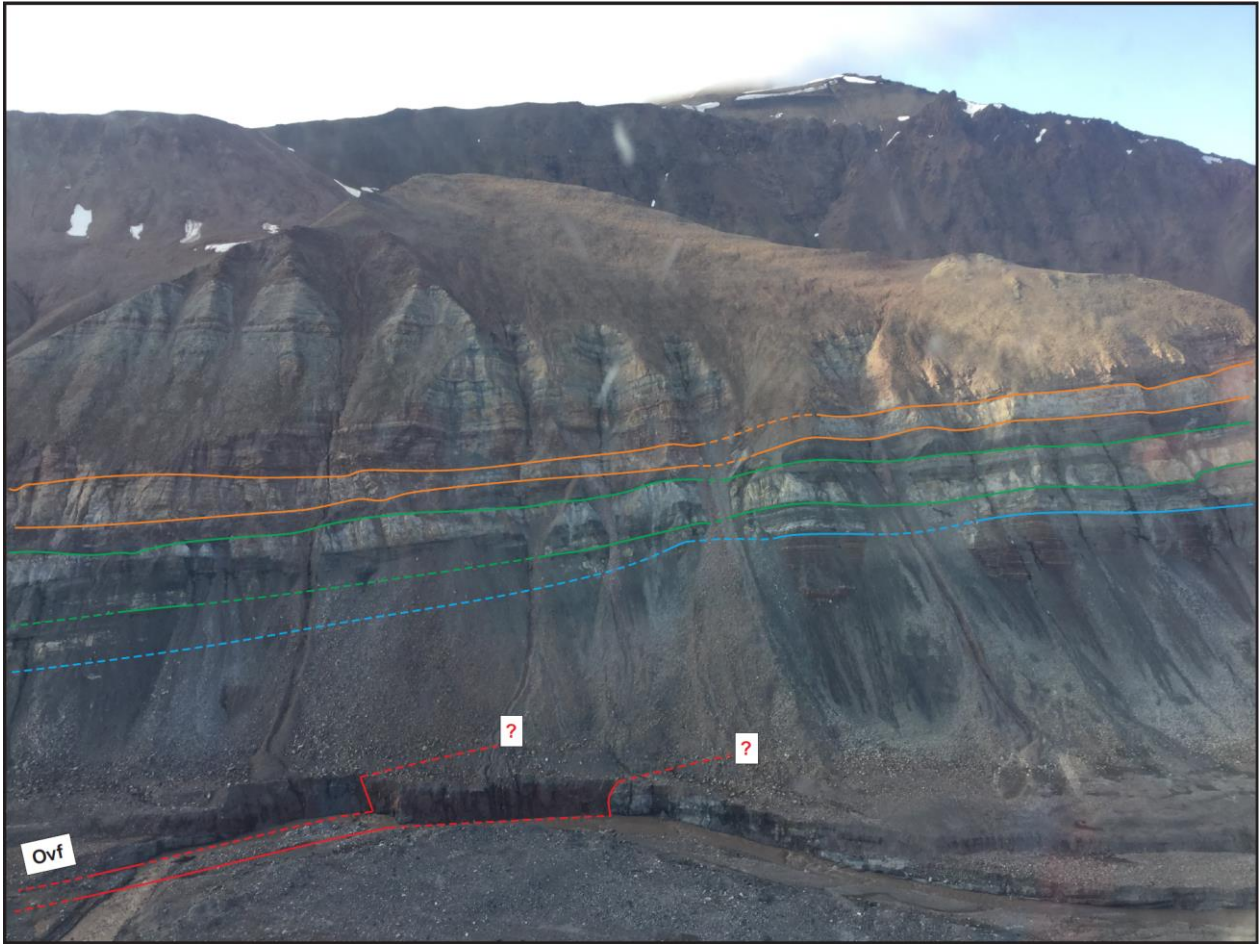

S1

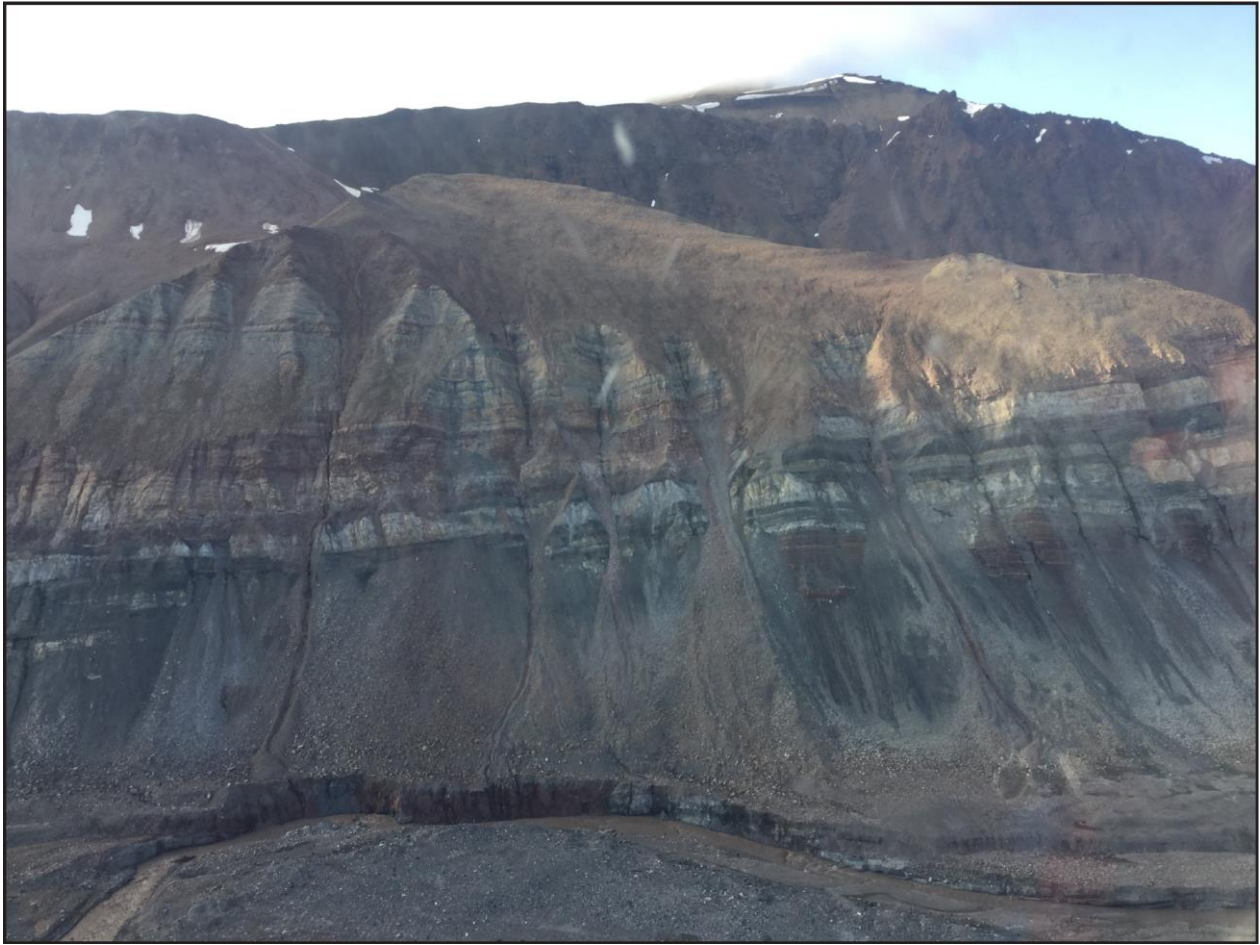

S2

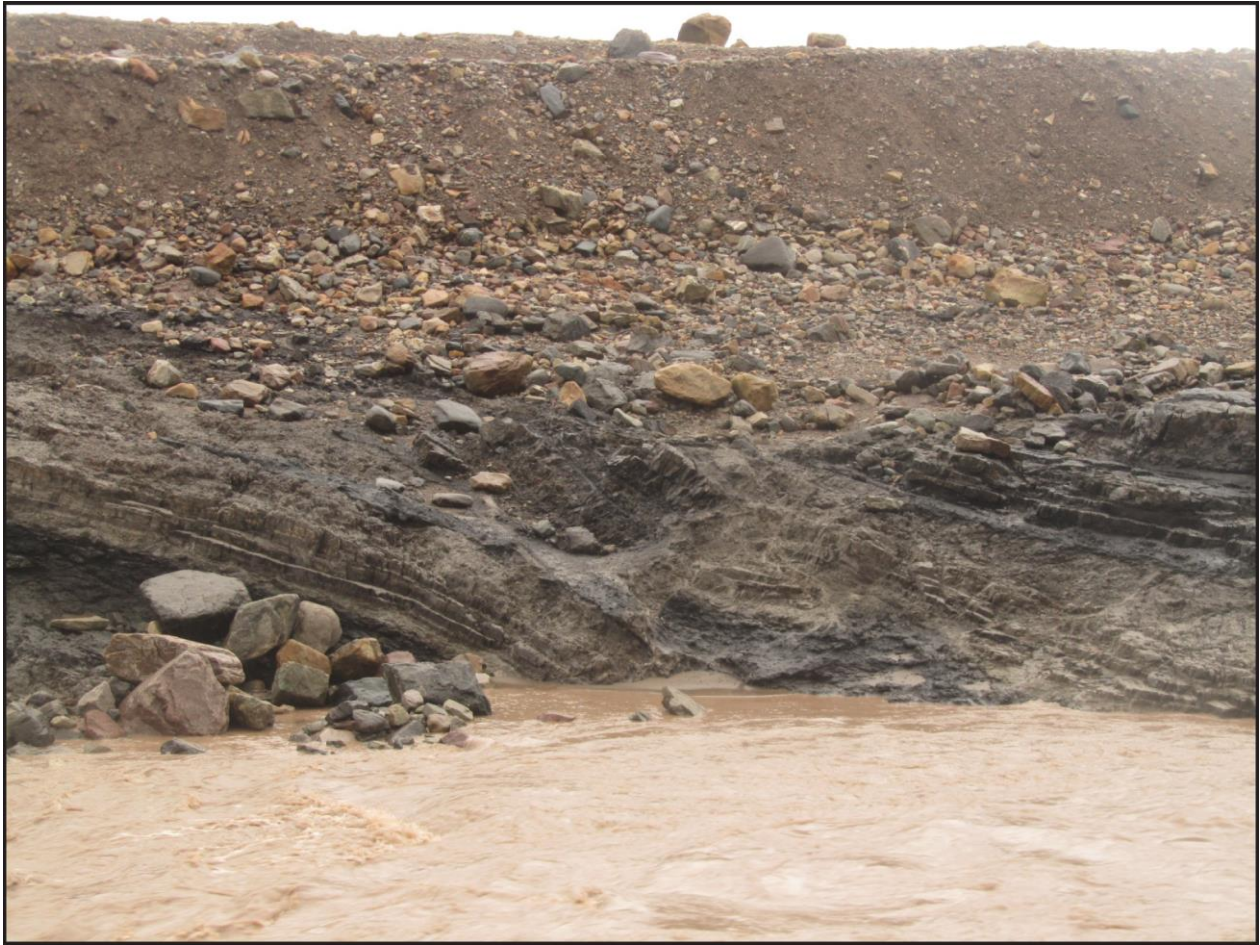

S3

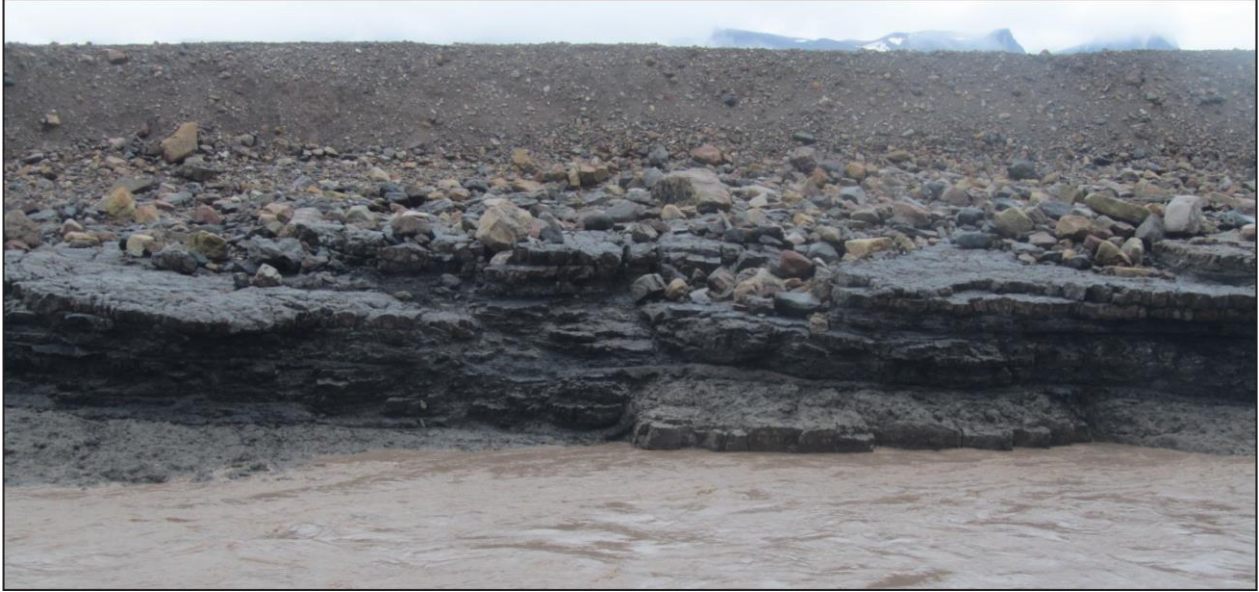

S4

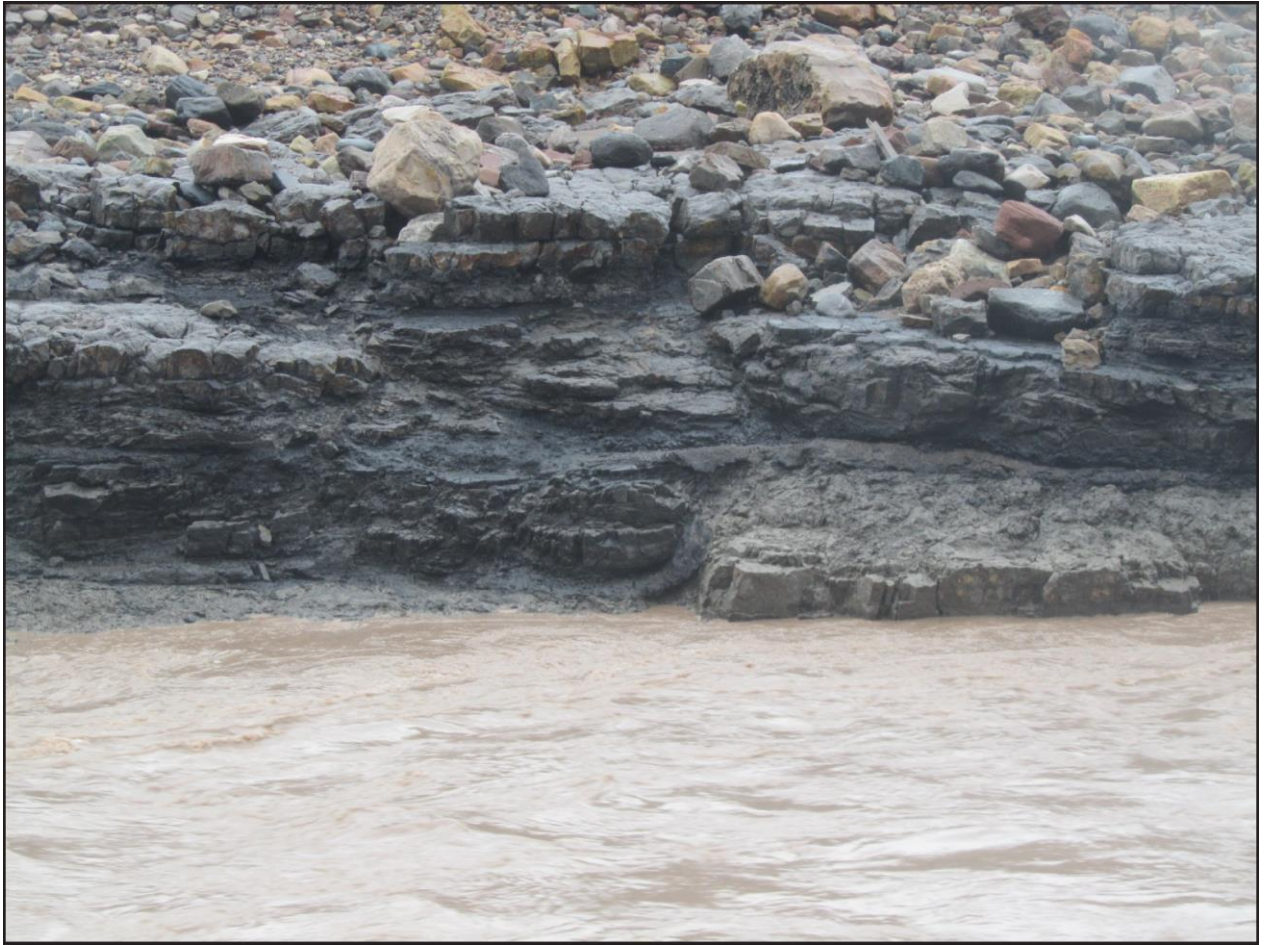

S5

Supplement: Supplementary file 1 [file se-2018-86-supplement.pdf]
